# Supplementary material for: Catalysis by solvation rather than the desolvation effect: exploring the catalytic efficiency of SAM-dependent chlorinase
Source: Royal Society of Chemistry journal article supplement (doi:10.1039/c7cp02811c), 2017-01-01
Supplement: c7cp02811c5.pdf [file c7cp02811c5.pdf]

## Supporting Information

# Catalysis by solvation rather than desolvation effect: Exploring the Catalytic power of Methyltransferases

Edson Silva<sup>1</sup>, Anderson H. Lima<sup>2</sup> and Jerônimo Lameira<sup>1\*</sup>

<sup>1</sup>*Institute of Biological Sciences, Federal University of Pará, 66075-110, Belém, PA, Brazil.*

<sup>2</sup>*Institute of Exact and Natural Sciences, Federal University of Pará, 66075-110, Belém, PA, Brazil.*

\*Corresponding author: Jerônimo Lameira; Phone: +55 91-32018235; email: [lameira@ufpa.br](mailto:lameira@ufpa.br)

**Figure S1.** The two EVB states and atom types used to simulate the methyl transfer from SAM to chloride.

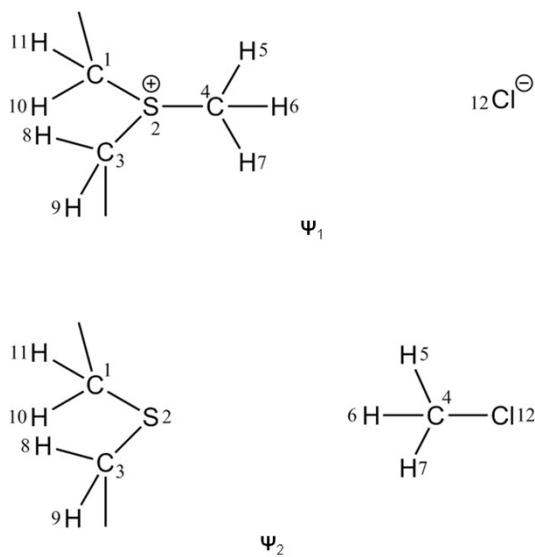

Table S1. Activation and reaction energies (kcal/mol) obtained from HF, M062X and MP2 with set basis 6-31+G(d,p), for reaction involving Cl<sup>-</sup> and trimethylsulfonium in gaseous and aqueous environment. The ZPVEs were included in the calculations.

|                         | HF     |         | M062X  |         | MP2    |         |
|-------------------------|--------|---------|--------|---------|--------|---------|
|                         | Gas    | Solvent | Gas    | Solvent | Gas    | Solvent |
| $\Delta E^*$ (kcal/mol) | 5.44   | 30.29   | 1.39   | 10.89   | 3.76   | 17.37   |
| $\Delta E^0$ (kcal/mol) | -35.30 | 7.94    | -34.85 | 0.80    | -36.50 | 4.27    |

Table S2. Key distance calculated at HF, M062X and MP2 with set basis 6-31+G(d,p), level of optimization for Reactants State (RS), Transitions State (TS) and Products State (PS).

|             | HF   |      |      | M062X |      |      | MP2  |      |      |
|-------------|------|------|------|-------|------|------|------|------|------|
|             | RS   | TS   | PS   | RS    | TS   | PS   | RS   | TS   | PS   |
| <b>S-C</b>  | 1.82 | 2.18 | 3.22 | 1.83  | 2.05 | 3.12 | 1.81 | 2.08 | 3.13 |
| <b>C-Cl</b> | 3.01 | 2.52 | 1.79 | 2.90  | 2.52 | 1.79 | 2.93 | 2.47 | 1.78 |
| <b>Cl-S</b> | 4.78 | 4.70 | 5.00 | 4.62  | 4.58 | 4.91 | 4.64 | 4.55 | 4.92 |

Table S3. Key distance calculated at EVB for reaction involving Cl<sup>-</sup> and trimethylsulfonium, for the Reactants State (RS), the Transitions State (TS) and Products State (PS) on Water, Protein and Mutant (Y70T).

|             | Water |      |      | Protein             |                     |                     | Mutant              |                     |                     |
|-------------|-------|------|------|---------------------|---------------------|---------------------|---------------------|---------------------|---------------------|
|             | RS    | TS   | PS   | RS                  | TS                  | PS                  | RS                  | TS                  | PS                  |
| <b>S-C</b>  | 1.81  | 1.98 | 5.58 | 1.77 ( $\pm 0.01$ ) | 1.93 ( $\pm 0.02$ ) | 4.13 ( $\pm 0.52$ ) | 1.78 ( $\pm 0.01$ ) | 2.00 ( $\pm 0.03$ ) | 3.42 ( $\pm 0.11$ ) |
| <b>C-Cl</b> | 3.35  | 2.13 | 1.73 | 2.67 ( $\pm 0.23$ ) | 2.75 ( $\pm 0.05$ ) | 1.77 ( $\pm 0.06$ ) | 2.79 ( $\pm 0.03$ ) | 2.22 ( $\pm 0.04$ ) | 1.84 ( $\pm 0.04$ ) |
| <b>Cl-S</b> | 4.49  | 4.10 | 4.81 | 4.29 ( $\pm 0.23$ ) | 4.18 ( $\pm 0.04$ ) | 4.76 ( $\pm 0.42$ ) | 3.92 ( $\pm 0.09$ ) | 4.19 ( $\pm 0.03$ ) | 4.38 ( $\pm 0.42$ ) |

Table S4. The EVB Parameters for reaction involving Cl<sup>-</sup> and trimethylsulfonium in solution.

Charges:

| Reactant State |                |           | Product State |           |
|----------------|----------------|-----------|---------------|-----------|
| Atom number    | Atom Type      | Charge    | Atom Type     | Charge    |
| 1              | C0             | -0.354179 | C0            | -0.184985 |
| 2              | S+             | 0.314698  | S0            | -0.361849 |
| 3              | C0             | -0.354179 | C0            | -0.184985 |
| 4              | C0             | -0.354179 | C0            | -0.530236 |
| 5              | H0             | 0.238665  | H0            | 0.149500  |
| 6              | H0             | 0.238665  | H0            | 0.149500  |
| 7              | H0             | 0.238665  | H0            | 0.149500  |
| 8              | H0             | 0.238665  | H0            | 0.017991  |
| 9              | H0             | 0.238665  | H0            | 0.282833  |
| 10             | H0             | 0.238665  | H0            | 0.282833  |
| 11             | H0             | 0.238665  | H0            | 0.282833  |
| 12             | L <sup>-</sup> | -0.922816 | L0            | -0.131068 |

$$1 - e^{\{-a(b-b_0)\}_2} \Delta M = D$$

Bonds:

| Bond Type | $D$   | $b_0$ | $a$ |
|-----------|-------|-------|-----|
| C0-S+     | 70.0  | 1.80  | 2.0 |
| C0-S0     | 70.0  | 1.80  | 2.0 |
| C0-L-     | 120.0 | 1.40  | 0.8 |
| C0-L0     | 120.0 | 1.35  | 0.8 |

$$U_0 = \frac{1}{2} K_\theta (\theta - \theta_0)^2$$

Bond Angles:

| Bond Type | $\theta$ | $K_\theta$ |
|-----------|----------|------------|
| X-S+-Y    | 102.5    | 100.0      |
| X-S0-Y    | 103.5    | 100.0      |
| X-C0-Y    | 109.5    | 50.0       |
| X-L- -Y   | 120.0    | 50.0       |
| X-L0-Y    | 109.0    | 50.0       |

$$U_{nb} = A_i A_j r^{-12} - B_i B_j r^{-6}$$

Nobonded :

| Bond Type | $A$    | $B$  |
|-----------|--------|------|
| H0        | 7.00   | 0.00 |
| S+        | 1831.8 | 23.0 |
| S0        | 1022.5 | 23.0 |

|           |                         |        |      |
|-----------|-------------------------|--------|------|
|           | C0                      | 632.0  | 24.0 |
|           | L-                      | 1400.0 | 24.0 |
|           | L0                      | 774.0  | 24.0 |
| <hr/>     |                         |        |      |
| Nobonded: | $U_{nb} = Ae^{\{-ar\}}$ |        |      |

|  |                  |          |          |
|--|------------------|----------|----------|
|  | <b>Bond Type</b> | <b>A</b> | <b>a</b> |
|  | C0...S+          | 19999.0  | 4.0      |
|  | C0...S0          | 19999.0  | 4.0      |

off-diagonal and shift parameters

A=-21.0

$\alpha$ = -140.0

$\mu$ =0.0

Table S5. Contributions to Solvation free Energy (kcal/mol) for the Reactant State (RS) and the Transition State (TS) in the water reference reaction. The energies were obtained through LRA.

|                                            | Water    |         | Water    |         |
|--------------------------------------------|----------|---------|----------|---------|
|                                            | RS (SAM) | RS (CI) | TS (SAM) | TS (CI) |
| <b>Intra</b>                               | -99.04   | -63.62  | -78.9    | -44.56  |
| <b>Solvation/p</b>                         | 0.00     | 0.00    | 0.00     | 0.00    |
| <b>Solvation /w</b>                        | 4.82     | -24.11  | 3.21     | -14.36  |
| <b>Elect (total)</b>                       | -94.21   | -87.74  | -75.69   | -56.92  |
| $\langle U_Q - U_0 \rangle_Q$              | -125.55  | -155.08 | -108.83  | -120.01 |
| $\langle U_Q - U_0 \rangle_0$              | 5.57     | 10.43   | 29.06    | 39.6    |
| <b><math>\Delta G_{\text{solv}}</math></b> | -59.99   | -72.33  | -39.88   | -40.21  |

Table S5. Contributions to Solvation free Energy (kcal/mol) for the Reactant State (RS) and the Transition State (TS) in the protein native.

|                                            | Protein                |                        | Protein               |                        |
|--------------------------------------------|------------------------|------------------------|-----------------------|------------------------|
|                                            | RS (SAM)               | RS (CI)                | TS (SAM)              | TS (CI)                |
| <b>Intra</b>                               | -96.42 ( $\pm 0.26$ )  | -61.10 ( $\pm 0.44$ )  | -78.24 ( $\pm 2.74$ ) | -46.80 ( $\pm 1.62$ )  |
| <b>Solvation/p</b>                         | 30.82 ( $\pm 0.93$ )   | -60.22 ( $\pm 1.02$ )  | 27.16 ( $\pm 3.89$ )  | -61.10 ( $\pm 2.83$ )  |
| <b>Solvation /w</b>                        | -16.82 ( $\pm 0.43$ )  | 16.95 ( $\pm 0.57$ )   | -13.43 ( $\pm 8.10$ ) | 22.85 ( $\pm 3.43$ )   |
| <b>Elect (total)</b>                       | -82.43 ( $\pm 0.24$ )  | -104.38 ( $\pm 1.16$ ) | -64.52 ( $\pm 1.47$ ) | -85.05 ( $\pm 2.22$ )  |
| $\langle U_Q - U_0 \rangle_Q$              | -109.40 ( $\pm 1.03$ ) | -130.06 ( $\pm 0.09$ ) | -96.99 ( $\pm 7.86$ ) | -109.68 ( $\pm 2.29$ ) |
| $\langle U_Q - U_0 \rangle_0$              | -3.62 ( $\pm 1.46$ )   | -43.51 ( $\pm 2.95$ )  | 13.56 ( $\pm 3.7$ )   | -25.00 ( $\pm 0.01$ )  |
| <b><math>\Delta G_{\text{solv}}</math></b> | -56.51 ( $\pm 1.25$ )  | -86.78 ( $\pm 1.43$ )  | -41.71 ( $\pm 2.08$ ) | -67.34 ( $\pm 1.15$ )  |

Table S5. Contributions to Solvation free Energy (kcal/mol) for the Reactant State (RS) and the Transition State (TS) in the Mutant.

|                                            | Mutant                  |                        | Mutant                |                       |
|--------------------------------------------|-------------------------|------------------------|-----------------------|-----------------------|
|                                            | RS (SAM)                | RS (CI)                | TS (SAM)              | TS (CI)               |
| <b>Intra</b>                               | -133.90 ( $\pm 37.89$ ) | -68.94 ( $\pm 0.06$ )  | -82.85 ( $\pm 0.08$ ) | -46.79 ( $\pm 0.26$ ) |
| <b>Solvation/p</b>                         | 30.87 ( $\pm 1.82$ )    | -56.84 ( $\pm 0.24$ )  | 27.75 ( $\pm 3.09$ )  | -52.70 ( $\pm 2.06$ ) |
| <b>Solvation /w</b>                        | -8.93 ( $\pm 1.61$ )    | 22.22 ( $\pm 2.65$ )   | -11.79 ( $\pm 0.40$ ) | 17.05 ( $\pm 1.33$ )  |
| <b>Elect (total)</b>                       | -84.97 ( $\pm 0.49$ )   | -103.56 ( $\pm 2.47$ ) | -66.88 ( $\pm 3.41$ ) | -80.93 ( $\pm 2.70$ ) |
| $\langle U_Q - U_0 \rangle_Q$              | -133.86 ( $\pm 0.30$ )  | -136.62 ( $\pm 1.67$ ) | -91.92 ( $\pm 0.39$ ) | -112.95 ( $\pm 3.5$ ) |
| $\langle U_Q - U_0 \rangle_0$              | -8.84 ( $\pm 0.48$ )    | -40.79 ( $\pm 2.55$ )  | 21.05 ( $\pm 12.21$ ) | -11.36 ( $\pm 1.9$ )  |
| <b><math>\Delta G_{\text{solv}}</math></b> | -61.35 ( $\pm 0.38$ )   | -88.7 ( $\pm 2.11$ )   | -35.43 ( $\pm 5.9$ )  | -62.16 ( $\pm 3.1$ )  |
